# Supplementary material for: Fluxes, patterns and sources of phosphorus deposition in an urban-rural transition region in Southwest China
Source: Copernicus journal article supplement (doi:10.5194/acp-2022-388), 2022-07-07
Supplement: Supplementary file 1 [file acp-2022-388-supplement.pdf]

## Supplement

Table S1. Site descriptions.

| Site code | Land-use types <sup>a</sup> | Latitude    | Longitude  | Elevation (m) | Annual precipitation (mm) | Temperature (°C) | Wind Speed (m s <sup>-1</sup> ) | Relative Humidity (%) |
|-----------|-----------------------------|-------------|------------|---------------|---------------------------|------------------|---------------------------------|-----------------------|
| SS        | UA                          | E103°39'45" | N30°37'48" | 534           | 720.4                     | 17.0             | 1.1                             | 81.4                  |
| YS        | UA                          | E103°41'56" | N30°37'24" | 513           | 726.5                     | 17.0             | 1.1                             | 81.3                  |
| XB        | UA                          | E103°39'57" | N30°36'02" | 522           | 702.8                     | 17.1             | 1.1                             | 81.4                  |
| LY        | IAA                         | E103°36'49" | N30°33'14" | 507           | 682.5                     | 17.7             | 1.4                             | 81.2                  |
| SAUF      | IAA                         | E103°40'15" | N30°32'36" | 509           | 679.1                     | 17.7             | 1.5                             | 81.2                  |
| CC        | IAA                         | E103°45'32" | N30°33'11" | 479           | 690.9                     | 17.6             | 1.5                             | 81.1                  |
| LJ        | RA                          | E103°39'02" | N30°46'51" | 534           | 794.0                     | 17.0             | 1.0                             | 75.9                  |
| YT        | RA                          | E103°37'43" | N30°44'12" | 579           | 815.3                     | 17.3             | 1.0                             | 76                    |
| HY        | RA                          | E103°31'53" | N30°44'44" | 623           | 779.3                     | 17.0             | 1.0                             | 76.1                  |

**Note:** <sup>a</sup>SS, Shangnan Street; YS, Yuantong Street; XB, Xihe Bridge; CC, Caichang; LY, Liaoyuan; QQ, Qiquan; YT, Yuantong; LJ, Liujie; HY, Huaiyuan. UA, urban area, <sup>b</sup>IAA, intensive agricultural area; RA, rural area.

**Table S2. Correlation coefficients of P deposition with meteorological factors**

|                  | Precipitation<br>(mm) | Wind Speed<br>(m s <sup>-1</sup> ) | Relative<br>Humidity (%) | Temperature<br>(°C) |
|------------------|-----------------------|------------------------------------|--------------------------|---------------------|
| AWD <sup>a</sup> | 0.92**                | 0.12                               | 0.16                     | 0.57**              |
| ADD <sup>b</sup> | -0.18                 | 0.06                               | 0.44**                   | -0.04               |
| ATD <sup>c</sup> | 0.36**                | 0.12                               | 0.48**                   | 0.29*               |

**Note:** “\*\*” and “\*” indicate  $P < 0.01$  and  $P < 0.05$ , respectively.
